# Supplementary material for: Glucocorticoid receptor signaling in astrocytes is required for aversive memory formation
Source: PubMed Central journal article supplement (PMC6261947; doi:10.1038/s41398-018-0300-x), 2018-11-28
Supplement: 41398_2018_300_MOESM2_ESM.pdf [file 41398_2018_300_MOESM2_ESM.pdf]

**Summary of statistical analysis**

| <b>Fig 1C</b>    |       |      |   |           |      |   |         |        |
|------------------|-------|------|---|-----------|------|---|---------|--------|
| GR+S100β+/S100β+ | CTRL  |      |   | GRastroKO |      |   | p-value | Test   |
|                  | Mean  | SD   | n | Mean      | SD   | n |         |        |
| HIP              | 99.23 | 0.28 | 4 | 54.43     | 1.4  | 4 | p<0.001 | t-test |
| PFC              | 99.72 | 0.56 | 4 | 76.8      | 3.8  | 4 | 0.001   |        |
| AMY              | 99.06 | 0.78 | 4 | 90.1      | 3.58 | 4 | 0.006   |        |

| <b>Fig 1D</b>     |       |       |   |           |       |   |         |        |
|-------------------|-------|-------|---|-----------|-------|---|---------|--------|
| <i>Nr3c1/Actb</i> | CTRL  |       |   | GRastroKO |       |   | p-value | Test   |
|                   | Mean  | SD    | n | Mean      | SD    | n |         |        |
| Astrocytes        | 0.125 | 0.012 | 3 | 0.069     | 0.018 | 3 | 0.011   | t-test |
| Flow-through      | 0.061 | 0.016 | 3 | 0.063     | 0.029 | 3 | ns      |        |

| <b>Fig 1E</b>                     |       |      |   |           |      |   |         |        |
|-----------------------------------|-------|------|---|-----------|------|---|---------|--------|
| <i>Tsc22d3/Actb</i><br>% CTRL Sal | CTRL  |      |   | GRastroKO |      |   | p-value | Test   |
|                                   | Mean  | SD   | n | Mean      | SD   | n |         |        |
| PFC                               | 252.6 | 39.8 | 4 | 235.1     | 22.9 | 5 | ns      | t-test |
| STR                               | 381.9 | 57.0 | 4 | 379.5     | 53.6 | 5 | ns      |        |
| AMY                               | 334.8 | 51.4 | 4 | 262.6     | 8.3  | 5 | 0.016   |        |
| HIP                               | 400.1 | 38.6 | 4 | 290.9     | 34.3 | 5 | 0.003   |        |
| HTH                               | 319.5 | 47.3 | 4 | 183.0     | 17.0 | 5 | <0.001  |        |
| SC                                | 224.0 | 10.1 | 4 | 159.0     | 33.5 | 5 | 0.008   |        |

| <b>Fig 2B</b>      |       |      |    |            |      |    |         |                                                              |
|--------------------|-------|------|----|------------|------|----|---------|--------------------------------------------------------------|
| Freezing [%]       | CTRL  |      |    | GR astroKO |      |    | p-value | Test                                                         |
|                    | Mean  | SD   | n  | Mean       | SD   | n  |         |                                                              |
| FC retrieval: 24h  | 60.2  | 16.7 | 18 | 48.5       | 12   | 14 | 0.030   | Two-way repeated measures ANOVA/<br>Bonferroni post-hoc test |
| FC retrieval: 72h  | 54.7  | 19.5 | 18 | 39.8       | 69.4 | 14 | 0.024   |                                                              |
| p-value (vs 24h)   | ns    |      |    | ns         |      |    |         |                                                              |
| FC retrieval: 120h | 46.5  | 4    | 18 | 26.4       | 2.6  | 14 | <0.001  |                                                              |
| p-value (vs 24h)   | 0.003 |      |    | <0.001     |      |    |         |                                                              |
| FC retrieval: 168h | 49.6  | 4.3  | 18 | 26.8       | 3    | 14 | <0.001  |                                                              |
| p-value (vs 24h)   | 0.039 |      |    | <0.001     |      |    |         |                                                              |

| <b>Fig. 2</b>                        |       |      |    |            |      |    |         |      |
|--------------------------------------|-------|------|----|------------|------|----|---------|------|
| Panel / Parameter                    | CTRL  |      |    | GR astroKO |      |    | p-value | Test |
|                                      | Mean  | SD   | n  | Mean       | SD   | n  |         |      |
| C. Tail flick: latency [s]           | 3.52  | 0.51 | 10 | 3.38       | 0.33 | 10 | ns      |      |
| D. Hot plate: latency [s]            | 10.88 | 3.24 | 10 | 9.19       | 3    | 10 | ns      |      |
| E. Open Field:<br>Total distance [m] | 30.29 | 8.45 | 10 | 35.22      | 7.12 | 10 | ns      |      |
| F. Light-Dark Box:<br>Total entries  | 6.09  | 2.74 | 11 | 6.56       | 3.17 | 9  | ns      |      |

|                                                                      |        |       |    |        |       |    |    |        |
|----------------------------------------------------------------------|--------|-------|----|--------|-------|----|----|--------|
| <b>G.</b> Light-Dark Box:<br>Time in Light [s]                       | 56.18  | 23.83 | 11 | 57.89  | 23.72 | 9  | ns | t-test |
| <b>H.</b> Light-Dark Box:<br>Latency to Light [s]                    | 39.36  | 19.31 | 11 | 35.33  | 18.94 | 9  | ns |        |
| <b>I.</b> Novel Object Recognition:<br>Discrimination index [%]      | 50.04  | 16.56 | 11 | 62.01  | 9.22  | 9  | ns |        |
| <b>J.</b> Y Maze test: Spontaneous<br>Alternation Performance<br>[%] | 58.99  | 10.89 | 18 | 60.14  | 7.9   | 18 | ns |        |
| <b>K.</b> Tail suspension test:<br>Total immobility [s]              | 152.67 | 56.79 | 9  | 159.22 | 43.85 | 9  | ns |        |
| <b>L.</b> Sucrose preference [%]                                     | 84.96  | 13.21 | 11 | 86.77  | 8.75  | 9  | ns |        |

| <b>Fig 3</b>      |         |        |    |            |        |    |         |                                            |
|-------------------|---------|--------|----|------------|--------|----|---------|--------------------------------------------|
| CPP/CPA score [s] | CTRL    |        |    | GR astroKO |        |    | p-value | Test                                       |
|                   | Mean    | SD     | n  | Mean       | SD     | n  |         |                                            |
| CPP/CPA: SAL      | 11.41   | 341.57 | 13 | -19.11     | 289.6  | 14 | ns      | Two-way ANOVA/<br>Bonferroni post-hoc test |
| CPP/CPA: MOR      | 304.11  | 171.15 | 12 | 242.91     | 263.65 | 17 | ns      |                                            |
| p-value vs SAL    | 0.018   |        |    | 0.019      |        |    |         |                                            |
| CPP/CPA: NAL      | -257.51 | 261.03 | 19 | 27.24      | 166.91 | 14 | 0.003   |                                            |
| p-value vs SAL    | 0.015   |        |    | ns         |        |    |         |                                            |

| <b>Fig 4A</b>                             |      |      |   |           |      |   |         |        |
|-------------------------------------------|------|------|---|-----------|------|---|---------|--------|
| Fold DEX/SAL<br>normalized to <i>Hprt</i> | 2h   |      |   |           |      |   |         |        |
|                                           | CTRL |      |   | GRastroKO |      |   | p-value | Test   |
|                                           | Mean | SD   | n | Mean      | SD   | n |         |        |
| <i>Sgk1_001</i>                           | 4.23 | 1.27 | 3 | 1.58      | 0.09 | 3 | 0.023   | t-test |
| <i>Pdk4</i>                               | 1.34 | 0.83 | 3 | 1.12      | 0.81 | 3 | ns      |        |
| <i>Slc2a1</i>                             | 1.68 | 0.99 | 3 | 1.33      | 0.35 | 3 | ns      |        |
| <i>Hk1</i>                                | 0.79 | 0.23 | 3 | 0.93      | 0.31 | 3 | ns      |        |
| <i>Ldha</i>                               | 0.91 | 0.17 | 3 | 1.14      | 0.05 | 3 | ns      |        |
| Fold DEX/SAL<br>normalized to <i>Hprt</i> | 4h   |      |   |           |      |   |         |        |
|                                           | CTRL |      |   | GRastroKO |      |   | p-value | Test   |
|                                           | Mean | SD   | n | Mean      | SD   | n |         |        |
| <i>Sgk1_001</i>                           | 1.97 | 0.61 | 4 | 1.96      | 0.64 | 4 | ns      | t-test |
| <i>Pdk4</i>                               | 2.52 | 0.74 | 4 | 1.34      | 0.23 | 4 | 0.023   |        |
| <i>Slc2a1</i>                             | 3.23 | 0.76 | 4 | 1.95      | 0.71 | 4 | 0.042   |        |
| <i>Hk1</i>                                | 1.16 | 0.46 | 4 | 0.99      | 0.25 | 4 | ns      |        |
| <i>Ldha</i>                               | 1.11 | 0.44 | 4 | 0.91      | 0.19 | 4 | ns      |        |

| <b>Fig 4B</b>           |       |       |   |       |       |   |         |      |
|-------------------------|-------|-------|---|-------|-------|---|---------|------|
| relative to <i>Hprt</i> | Naive |       |   | 5xFS  |       |   | p-value | Test |
|                         | Mean  | SD    | n | Mean  | SD    | n |         |      |
| <i>Sgk1_001</i>         | 0.106 | 0.018 | 5 | 0.206 | 0.057 | 5 | 0.006   |      |

|                 |       |       |   |       |       |   |       |        |
|-----------------|-------|-------|---|-------|-------|---|-------|--------|
| <i>Sgk1_002</i> | 0.050 | 0.009 | 5 | 0.060 | 0.009 | 5 | ns    | t-test |
| <i>Sgk1_003</i> | 0.005 | 0.003 | 5 | 0.019 | 0.011 | 5 | 0.025 |        |

| <b>Fig 4C</b>           |        |       |   |        |       |   |         |                                             |
|-------------------------|--------|-------|---|--------|-------|---|---------|---------------------------------------------|
|                         | Veh    |       |   | Dex    |       |   | p-value | Test                                        |
|                         | Mean   | SD    | n | Mean   | SD    | n |         |                                             |
| <b>Glucose uptake</b>   |        |       |   |        |       |   |         |                                             |
| LV-shCtrl               | 100    | 24.42 | 3 | 187.59 | 40.42 | 3 | 0.003   | Two-way ANOVA /<br>Bonferroni post-hoc test |
| LV-shSgk1               | 211.39 | 9.37  | 3 | 201.76 | 16.07 | 3 | ns      |                                             |
| p-value                 | <0.001 |       |   | ns     |       |   |         |                                             |
| <b>Lactate release</b>  |        |       |   |        |       |   |         |                                             |
| LV-shCtrl               | 100    | 3.63  | 3 | 144.75 | 10.26 | 3 | 0.002   | Two-way ANOVA /<br>Bonferroni post-hoc test |
| LV-shSgk1               | 118.59 | 17.32 | 3 | 168.51 | 13.41 | 3 | 0.001   |                                             |
| p-value                 | ns     |       |   | 0.045  |       |   |         |                                             |
| <b>Glycogen content</b> |        |       |   |        |       |   |         |                                             |
| LV-shCtrl               | 100    | 47.87 | 4 | 42.33  | 23.93 | 4 | 0.048   | Two-way ANOVA /<br>Bonferroni post-hoc test |
| LV-shSgk1               | 111.78 | 51.24 | 4 | 47.11  | 14.02 | 4 | 0.027   |                                             |
| p-value                 | ns     |       |   | ns     |       |   |         |                                             |

| <b>Suppl. Fig 4</b>                   |       |      |   |        |       |   |         |                                             |
|---------------------------------------|-------|------|---|--------|-------|---|---------|---------------------------------------------|
| <i>Sgk1 / Hprt</i><br>% LV-shCtrl Veh | Veh   |      |   | Dex    |       |   | p-value | Test                                        |
|                                       | Mean  | SD   | n | Mean   | SD    | n |         |                                             |
| LV-shCtrl                             | 100   | 12.1 | 3 | 621.56 | 98.12 | 3 | <0.001  | Two-way ANOVA /<br>Bonferroni post-hoc test |
| LV-shSgk1                             | 22.26 | 12.3 | 3 | 115.7  | 29.96 | 3 | ns      |                                             |
| p-value                               | ns    |      |   | <0.001 |       |   |         |                                             |
